# Supplementary material
Source: HighWire-hosted journal article supplement (http://ajnr-stage2.highwire.org/highwire/filestream/99334/field_highwire_adjunct_files/0/0085.pdf)
Supplement: 0085.pdf [file 0085.pdf]

**Table 1. Major neuroimaging characteristics of study patients.**

| Patient | Tumor localization  |             | Side       | Tumor volume (cm <sup>3</sup> ) | Contrast enhancement             | Tumor pattern (T2WI/FLAIR) | Bone remodeling                       | Relation to basal arteries    | Defects (cyst/ necrosis/ VRS) |
|---------|---------------------|-------------|------------|---------------------------------|----------------------------------|----------------------------|---------------------------------------|-------------------------------|-------------------------------|
|         | Lobe(s)             | Orientation |            |                                 |                                  |                            |                                       |                               |                               |
| 1       | Both frontal        | Basal       | Left>right | 64.45                           | No                               | Ground glass               | Olfactory groove                      | Encasement                    | Yes                           |
| 2       | Frontal<br>Temporal | Basal       | Right      | 80.14                           | No                               | Ground glass               | Skull base,<br>Sphenoid body and wing | Encasement                    | Yes                           |
| 3       | Temporal            | Anterior    | Left       | 65.92                           | Yes (intermediate,<br>band-like) | Band-like                  | Sphenoid wing                         | Displacement                  | Yes                           |
| 4       | Temporal            | Mesial      | Right      | 2.28                            | No                               | Ground glass               | No direct contact to bone             | No direct contact to arteries | No                            |
| 5       | Both frontal        | Basal       | Left>right | 35.83                           | No                               | Ground glass               | Orbital roof                          | Encasement                    | Yes                           |
| 6       | Temporal            | Mesial      | Left       | 4.86                            | No                               | Ground glass               | No direct contact to bone             | No direct contact to arteries | Yes                           |
| 7       | Temporal            | Mesial      | Left       | 10.05                           | No                               | Ground glass               | Anterior clinoid process              | No direct contact to arteries | Yes                           |
| 8       | Frontal             | Convexity   | Right      | 5.82                            | Yes (intermediate,<br>band-like) | Band-like                  | Parietal bone                         | No direct contact to arteries | Yes                           |
| 9       | Frontal             | Basal       | Right      | 44.46                           | Yes (intermediate,<br>patchy)    | Ground glass               | Anterior clinoid process              | Encasement                    | Yes                           |

**Table 2. Clinical and treatment-related characteristics of study patients.**

| Patient          | Sex    | Age at diagnosis (years) | Clinical presentation [duration]                                         | Primary diagnosis                                | Treatment                                                                                                                                               | Outcome                                                                                                                                                                           |
|------------------|--------|--------------------------|--------------------------------------------------------------------------|--------------------------------------------------|---------------------------------------------------------------------------------------------------------------------------------------------------------|-----------------------------------------------------------------------------------------------------------------------------------------------------------------------------------|
| 1                | female | 6.3                      | Seizures (complex partial) [4-5 months]                                  | CNS neuroblastoma IV                             | Partial resection<br>Individualized chemotherapy<br>Local irradiation (54 Gy)                                                                           | AWD<br>(stable residual mass)<br>FU: 10 months                                                                                                                                    |
| 2 <sup>1,2</sup> | female | 16.0                     | Seizures (complex partial),<br>nausea, “strange thoughts”<br>[18 months] | Anaplastic<br>oligodendroglioma III <sup>1</sup> | Partial resection<br>Local irradiation (59.4 Gy) <sup>2</sup>                                                                                           | PD (single lesion: right posterior<br>horn of the lateral ventricle)<br>26 months after diagnosis →<br>Complete resection,<br>chemotherapy → PD<br>LTFU 71 months after diagnosis |
| 3                | female | 12.8                     | Intermittent double vision<br>[1 month]                                  | CNS neuroblastoma IV                             | Partial resection<br>CSI (35.2 Gy/boost 55 Gy)<br>8 cycles chemotherapy<br>(vincristine/lomustine/cisplatin/carboplatin)<br>Second resection (complete) | NED<br>FU: 39 months                                                                                                                                                              |
| 4 <sup>3</sup>   | male   | 4.2                      | Seizures (complex partial)<br>[1 day]                                    | Anaplastic<br>oligodendroglioma III              | Complete resection<br>Local irradiation (54 Gy)<br>Temozolomide (synchronous<br>and 12 cycles maintenance)                                              | NED<br>FU: 34 months                                                                                                                                                              |
| 5                | female | 7.6                      | not reported                                                             | Anaplastic<br>oligodendroglioma III              | Partial resection<br>Local irradiation (59.4 Gy)<br>Temozolomide (synchronous and<br>prolonged maintenance [18 months])                                 | AWD<br>(stable residual mass)<br>FU: 21 months                                                                                                                                    |
| 6                | male   | 11.8                     | Seizures (complex partial)<br>[<1 month]                                 | Dysembryoplastic<br>neuroepithelial tumor I      | Complete resection                                                                                                                                      | NED<br>FU: 108 months                                                                                                                                                             |

**Table 2. Clinical and treatment-related characteristics of study patients (continued):**

| Patient | Sex    | Age at diagnosis (years) | Clinical presentation [duration] | Primary diagnosis               | Treatment                                                                                                    | Outcome               |
|---------|--------|--------------------------|----------------------------------|---------------------------------|--------------------------------------------------------------------------------------------------------------|-----------------------|
| 7       | female | 6.4                      | Status epilepticus               | Anaplastic oligoastrocytoma III | Subtotal resection<br>Local irradiation (59.4 Gy)<br>Temozolomide (synchronous and 12 cycles maintenance)    | NED<br>FU: 154 months |
| 8       | female | 9.9                      | not reported                     | CNS PNET IV                     | Complete resection<br>CSI (27.2 Gy/boost 52.4 Gy)<br>8 cycles chemotherapy (vincristine/lomustine/cisplatin) | NED<br>FU: 61 months  |
| 9       | male   | 21.8                     | not reported                     | CNS PNET IV                     | Complete resection<br>CSI (36 Gy/boost 54 Gy)                                                                | NED<br>FU: 104 months |

<sup>1</sup>Second neuropathological review favored the diagnosis of atypical neurocytoma; <sup>2</sup>Local irradiation was delayed by 4 months after diagnosis due to patient's refusal; <sup>3</sup>An initial watch-and-wait strategy was pursued after first imaging, 3.5 months later second MRI showed massive progression.

*Abbreviations:* AWD, alive with disease; CSI, craniospinal irradiation; LTFU, lost to follow-up; NED, no evidence of disease; PD, progressive disease

**Figure 2. MRI scans of patient 4 at diagnosis (P4.1) and progression (P4.2).**

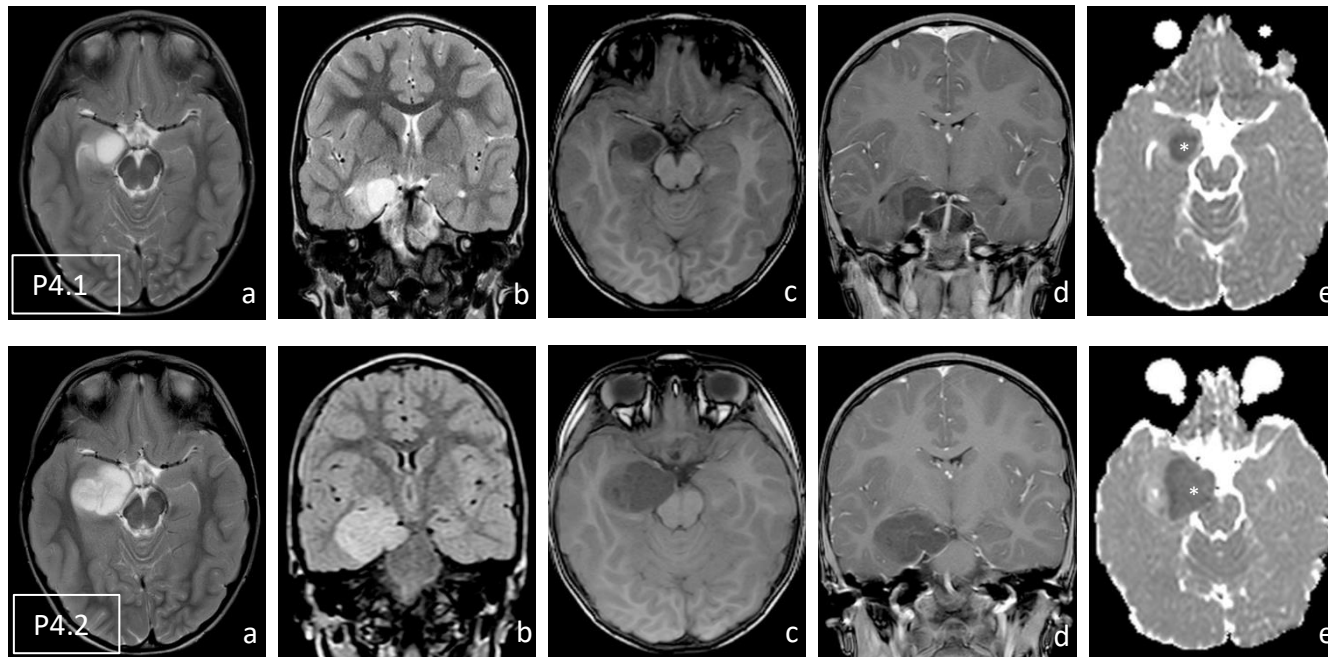

In patient 4, MRI scans at two different time-points (both prior to initiation of therapy) were available:

P4.1 depicts initial imaging; P4.2 shows a follow-up scan after 3.5 months without treatment, with a three-fold tumor volume increase accompanied by a reduction in the T2W and FLAIR signals;

Columns: (a) axial T2WI; (b) coronal T2WI (P4.1) and coronal FLAIR (P4.2); (c) axial T1WI; (d) coronal contrast-enhanced T1WI; (e) axial DWI/ADC.
